# Supplementary material for: Platelet Adhesion Mediated by von Willebrand Factor at High Shear Rates Is Associated with Premature Coronary Artery Disease
Source: MDPI journal article supplement (doi:10.3390/biomedicines11071916), 2023-07-06
Supplement: s1 [file s1]

# Regression analysis

## Materials and methods

A probability that a patient has premature coronary artery disease (CAD) was assessed using binary logistic regression. This method calculates a probability of an event (dependent variable) depending on values of independent variables.

A probability of an event is calculated using the following formula:

$$F(z) = \frac{1}{1 + e^{-z}}$$

$$Z = b_1 * x_1 + b_2 * x_2 + \dots + b_n * x_n + C;$$

$b_1, b_2, b_n$  – coefficients calculated using binary logistic regression;

$x_1, x_2, x_3$  – independent variable values;

$C$  – intercept.

Logistic regression analysis was performed for the data of 84 patients with premature CAD verified using coronary angiography and 64 patients without CAD.

The following parameters were taken as probable predictors of premature CAD: sex, age, family history of CAD, diabetes mellitus, hyperlipidemia, arterial hypertension, obesity, smoking, and a relative decrease in platelet adhesion after inhibition of GPIIb receptors.

Significant predictors included in the regression model was determined using the Wald test. To assess the quality of the model, we used the Hosmer-Lemeshow, Nagelkerke  $R^2$ , and ROC analyses. In addition, the results of the ROC-analysis, as well as the Youden's index were used to calculate the optimal cut-off value.

Regression analysis was performed using IBM SPSS Statistics 26.0, as well as the statistical software package Stata17.

## Calculation of regression coefficients. Construction of the prognostic model.

According to the Wald test ( $p < 0.05$ ), the following predictors were included in the regression model: male sex, smoking, age and a relative decrease in platelet adhesion after inhibition of GPIb receptors.

Table S1. Variables in the regression equation

| Variables in the equation                                                           | Coefficient ( $\beta$ ) | Standard error | Wald   | Significance | Odds ratio | 95% confidence interval for odds ratio |       |
|-------------------------------------------------------------------------------------|-------------------------|----------------|--------|--------------|------------|----------------------------------------|-------|
|                                                                                     |                         |                |        |              |            | Lower                                  | Upper |
| Male sex                                                                            | 1.092                   | 0.497          | 4.832  | 0.028        | 2.981      | 1.126                                  | 7.893 |
| Smoking                                                                             | 0.969                   | 0.45           | 4.639  | 0.031        | 2.635      | 1.091                                  | 6.363 |
| Age                                                                                 | 0.101                   | 0.031          | 10.537 | 0.001        | 1.106      | 1.041                                  | 1.176 |
| A relative decrease in platelet adhesion after inhibition of GPIb receptors, per 1% | 0.033                   | 0.007          | 22.722 | <0.001       | 1.033      | 1.019                                  | 1.047 |
| Intercept                                                                           | -7.786                  | 1.919          | 16.466 | <0.001       | <0.001     | –                                      | –     |

### Regression equation

$$F(z) = \frac{1}{1 + e^{-z}}$$

$$Z = 1.092 * Sex + 0.969 * Smoking + 0.101 * Age + 0.033 * A \text{ percentage decrease in platelet adhesion} - 7.786.$$

## Evaluation of the resulting model

Table S2. Evaluation of the resulting model

| Parameter | Hosmer-Lemeshev goodness of fit | Nagelkerke R <sup>2</sup> |
|-----------|---------------------------------|---------------------------|
| Value     | 0.053                           | 0.479                     |

The Hosmer-Lemeshev test shows that the observed event rate corresponds to the expected event rate in subgroups of the model population.

Nagelkerke R<sup>2</sup> shows that the model is acceptable for use.

### ROC analysis

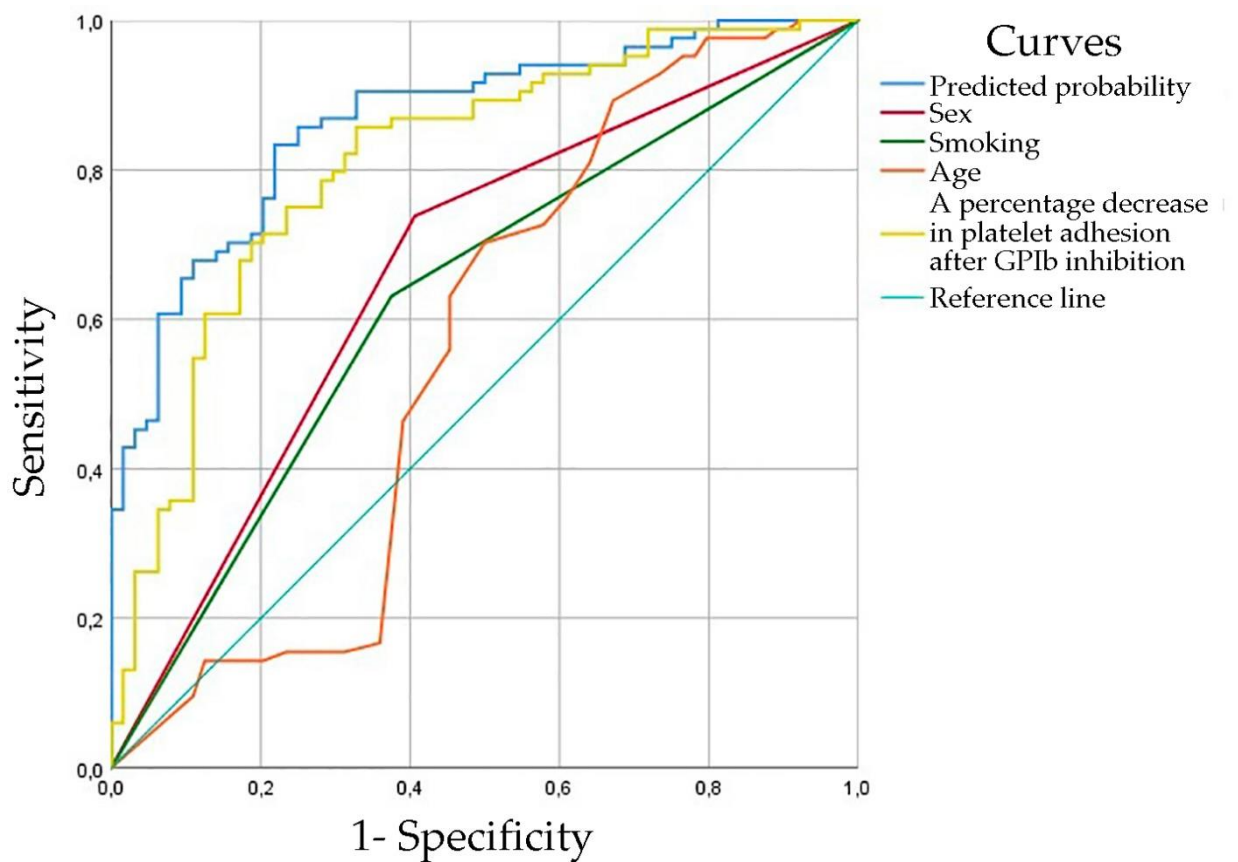

Table S3. Parameters of the ROC analysis

| Test result variables: predicted probability                                         |                      |                |                         |                                    |       |
|--------------------------------------------------------------------------------------|----------------------|----------------|-------------------------|------------------------------------|-------|
| Risk factors                                                                         | Area under the curve | Standard error | Asymptotic significance | Asymptotic 95% confidence interval |       |
|                                                                                      |                      |                |                         | Lower                              | Upper |
| Regression model                                                                     | 0.867                | 0.029          | <0.001                  | 0.810                              | 0.924 |
| Sex                                                                                  | 0.666                | 0.046          | 0.001                   | 0.576                              | 0.755 |
| Smoking                                                                              | 0.628                | 0.046          | 0.008                   | 0.537                              | 0.719 |
| Age                                                                                  | 0.563                | 0.051          | 0.191                   | 0.463                              | 0.663 |
| A relative decrease in platelet adhesion after inhibition of GPIIb receptors, per 1% | 0.812                | 0.036          | <0.001                  | 0.741                              | 0.883 |

Table S4. Classification table of the regression model

| Observed outcome                          | Predicted outcome |     | Percentage of correct predictions |
|-------------------------------------------|-------------------|-----|-----------------------------------|
|                                           | No CAD            | CAD |                                   |
| No CAD                                    | 50                | 14  | 78.1%                             |
| CAD                                       | 14                | 70  | 83.3%                             |
| Overall percentage of correct predictions |                   |     | 81.1%                             |

At  $F(z) \geq 0.586$  (cut-off value) CAD is probable (Sensitivity 83.3%, specificity 78.1%).

**Conclusion:** this model is applicable for determining patients with CAD. Further verification of the model should be performed on more data.
